# Supplementary material
Source: ML conference proceedings conference paper supplement (https://openaccess.thecvf.com/content/ICCV2023/html/Rodriguez-Puigvert_LightDepth_Single-View_Depth_ICCV_2023_paper.html)
Supplement: Supplementary file 1 [file Rodriguez-Puigvert_LightDepth_Single-View_Depth_ICCV_2023_supplemental.zip]

Archive with 2 entries (2 files):
- 12440-supp.pdf
- video-supplementary-12440.mp4
